# Supplementary material for: Design and Production of a Recombinant Hybrid Toxin to Raise Protective Antibodies against Loxosceles Spider Venom
Source: MDPI journal article supplement (doi:10.3390/toxins11020108), 2019-02-12
Supplement: s1 [file s1]

**A**

|                      |                                                                                           |                                               |                                |           |                |            |
|----------------------|-------------------------------------------------------------------------------------------|-----------------------------------------------|--------------------------------|-----------|----------------|------------|
|                      | 10                                                                                        | 20                                            | 30                             | 40        | 50             | 60         |
| LgRec1               | ADNRRPIWVMGHMVNSLAQID                                                                     | EFVGLGNSNIETDVS                               | FDKQANPEYTYHGIP                | <b>CD</b> | <b>CGRAC</b>   | <b>CLH</b> |
| phospholipase_D_3RLH | AGNRRPIWIMGHMVNAIGQID                                                                     | EFVNLGANSIETDVS                               | FDDNANPEYTYHGIP                | <b>CD</b> | <b>CGRNCKK</b> |            |
|                      | * * * * * : * * * * * : * * * * * * * : * * * * * * * * * * * * * :                       |                                               |                                |           |                |            |
|                      | 70                                                                                        | 80                                            | 90                             | 100       | 110            | 120        |
| LgRec1               | <u>STKFND</u> <u>FLKGLRKVTTPGDS</u>                                                       | <u>KYLEKLI</u> <u>LVVFDLKTGS</u>              | <u>LYDNQAYDAGTKLAKNLLQHYWN</u> |           |                |            |
| phospholipase_D_3RLH | <u>YENFND</u> <u>FLKGLRSATTPGNSKYQEK</u>                                                  | <u>LVLVVF</u> <u>DLKTGS</u>                   | <u>LYDNQANDAGKKLAKNLLQHYWN</u> |           |                |            |
|                      | : * * * * * * * * * * * * * * * * * * * * * * * * * * * * * * * * * * * * * * * :         |                                               |                                |           |                |            |
|                      | 130                                                                                       | 140                                           | 150                            | 160       | 170            | 180        |
| LgRec1               | NGNNGGRAYIILSIPNLNHYKLIT                                                                  | GFKETLKNEGHEELLEKVG                           | TDFSGNDDISDVQKTYN              |           |                |            |
| phospholipase_D_3RLH | NGNNGGRAYIVLSIPDLNHYPLIKG                                                                 | FKDQLTKDGHPELMDKVGH                           | DFSGNDDIGDVGKAYK               |           |                |            |
|                      | * * * * * : * * * * * * * * * * * * * * * * * * * * * * * * * * * * * * * * * :           |                                               |                                |           |                |            |
|                      | 190                                                                                       | 200                                           | 210                            | 220       | 230            | 240        |
| LgRec1               | <u>KAGVTGHVWQSDGITNCLLRGL</u>                                                             | <u>TRVKAAVANRDSGSGI</u>                       | <u>INKVYYWTVDKRQSTRDTLDAN</u>  |           |                |            |
| phospholipase_D_3RLH | <u>KAGITGHIWQSDGITNCLPRGL</u>                                                             | <u>SRVNAAVANRDSANGFINKVYYWTVDKRSTTRDALDAG</u> |                                |           |                |            |
|                      | * * * : * * * : * * * * * * * * * * * * * * * * * * * * * * * * * * * * * * * * * * * * : |                                               |                                |           |                |            |
|                      | 250                                                                                       | 260                                           | 270                            | 280       |                |            |
| LgRec1               | VDGIMTNP                                                                                  | PDITVEILNEAAYKKKFRIATYEDNPWETFKG              |                                |           |                |            |
| phospholipase_D_3RLH | VDGIMTNP                                                                                  | PDVITDVLNEAAYKKKFRVATYDDNPWVTFKK              |                                |           |                |            |
|                      | * * * * * * * * : : * * * * * * * * * * * * * * * * * * * * * * * * * * * * * :           |                                               |                                |           |                |            |

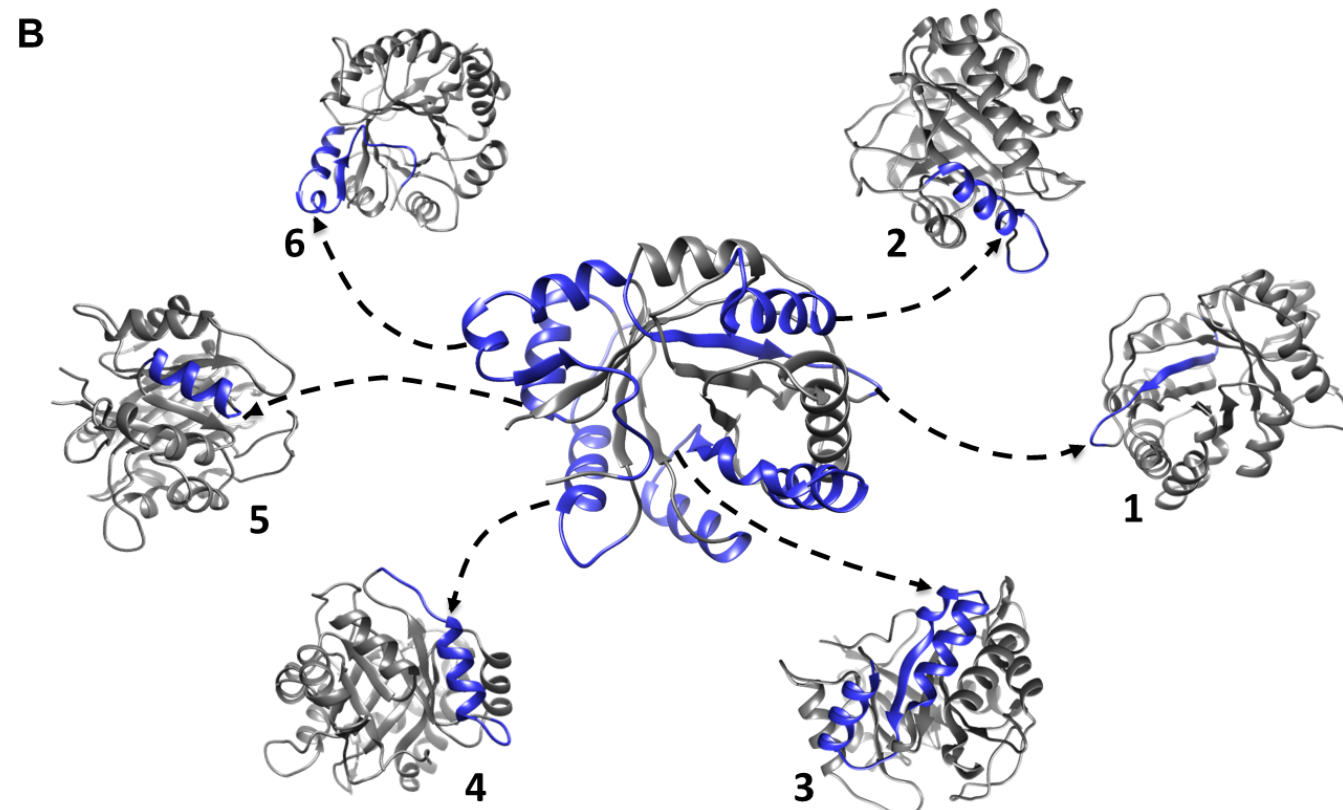

Figure S1: (A) Multiple alignment analysis of deduced amino acid sequences of LgRec1 (AFY98967) from *L. gaucho* and with the sequence of a phospholipase (PDB: 3RLH) from *L. intermedia* used as a template to predict the 3D structure of LgRec1. The hydrophilic regions of LgRec1 used to construct the hybrid immunogen are underlined. The cysteines and the residues that are involved in the catalysis are shown in boldface. Identical amino acids and conservative substitutions are indicated by (\*) and (:), respectively. (B) Predicted tridimensional structure of PLD LgRec1 showing the hydrophilic regions. The central picture shows highlighted in blue the six hydrophilic regions of LgRec1 chosen to construct the hybrid immunogen LgRec1ALP1. Each hydrophilic region is shown around the central picture. (1-SNSIETDVSFDKQ; 2-KFNDFLKGLRKVTTPGDSK; 3-KLI TGFKETLKNEGHEELLEKVGTDGSGNDDISDVQKTYNKAG; 4-LLRGLTRVKAAVANRDSGSG; 5-DKRQSTRDTLDAN; 6-PDITVEILNEAAYKKKFRIATYEDNPWET.
